# Supplementary material
Source: PubMed Central journal article supplement (PMC3592006)
Supplement: JB.02079-12_zjb999092474so1.pdf [file JB.02079-12_zjb999092474so1.pdf]

# Supplemental Material

## **Product-Mediated Regulation of Pentalenolactone Biosynthesis in *Streptomyces* by the MarR/SlyA Family Activators PenR and PntR**

Dongqing Zhu,<sup>1,2,#</sup> Yinping Wang,<sup>2,#</sup> Manman Zhang,<sup>2</sup> Haruo Ikeda,<sup>3</sup> Zixin Deng,<sup>2\*</sup> and David E. Cane<sup>1\*</sup>

<sup>1</sup>Department of Chemistry, Box H, Brown University, Providence, Rhode Island 02912-9108, United States

<sup>2</sup>The Key Laboratory of Combinatorial Biosynthesis and Drug Discovery (Ministry of Education), Wuhan University, Wuhan, Hubei Province, 430071, China

<sup>3</sup>Laboratory of Microbial Engineering, Kitasato Institute for Life Sciences, Kitasato University, 1-15-1 Kitasato, Sagami-hara, Minami-ku, Kanagawa 252-0373, Japan

\*Corresponding authors. Mailing address for D. E. Cane: Department of Chemistry, Box H, Brown University, Providence, RI 02912-9108, USA; Tel: +1-401-863-3588; E-mail:

David\_Cane@brown.edu . Mailing address for Z. Deng: The Key Laboratory of Combinatorial Biosynthesis and Drug Discovery (Ministry of Education), Wuhan University, Wuhan, Hubei Province, 430071, China; Tel: +86-027-68755417; E-mail: zxdeng@whu.edu.cn

#These authors contributed equally to this work.

**Table S1.** Strains, plasmids and cosmids used in this study.

| Strain or plasmid            | Relevant phenotype and/or characteristics                                                                                                                                                                                                                                                                                                                                                                              | Source                               |
|------------------------------|------------------------------------------------------------------------------------------------------------------------------------------------------------------------------------------------------------------------------------------------------------------------------------------------------------------------------------------------------------------------------------------------------------------------|--------------------------------------|
| <i>S. exfoliatus</i> strains |                                                                                                                                                                                                                                                                                                                                                                                                                        |                                      |
| UC5319                       | Wild-type, pentalenolactone producer                                                                                                                                                                                                                                                                                                                                                                                   | Upjohn Co (Pfizer) (1)               |
| ZD20                         | <i>penD</i> in-frame deletion mutant                                                                                                                                                                                                                                                                                                                                                                                   | (2)                                  |
| ZD22                         | <i>penM</i> in-frame deletion mutant                                                                                                                                                                                                                                                                                                                                                                                   | (3)                                  |
| ZD27                         | <i>penR</i> mutant, Apra <sup>+</sup>                                                                                                                                                                                                                                                                                                                                                                                  | This work                            |
| ZD27::pDQ90                  | Complementation of ZD27 with <i>penR</i> , Apra <sup>+</sup> , Thio <sup>+</sup>                                                                                                                                                                                                                                                                                                                                       | This work                            |
| ZD27::pDQ91                  | Complementation of ZD27 with <i>pntR</i> , Apra <sup>+</sup> , Thio <sup>+</sup>                                                                                                                                                                                                                                                                                                                                       | This work                            |
| ZD28                         | <i>penM-penR</i> double mutant, Apra <sup>+</sup>                                                                                                                                                                                                                                                                                                                                                                      | This work                            |
| ZD28::pDQ90                  | Complementation of ZD28 with <i>penR</i> , Apra <sup>+</sup> , Thio <sup>+</sup>                                                                                                                                                                                                                                                                                                                                       | This work                            |
| ZD28::pDQ91                  | Complementation of ZD28 with <i>pntR</i> , Apra <sup>+</sup> , Thio <sup>+</sup>                                                                                                                                                                                                                                                                                                                                       | This work                            |
| <i>S. arenae</i> strains     |                                                                                                                                                                                                                                                                                                                                                                                                                        |                                      |
| TÜ469                        | Wild-type, pentalenolactone producer                                                                                                                                                                                                                                                                                                                                                                                   | DSM 40734, DMSZ Braunschweig, DE (4) |
| <i>E. coli</i> strains       |                                                                                                                                                                                                                                                                                                                                                                                                                        |                                      |
| DH10B                        | F <sup>-</sup> <i>mcrA</i> , $\Delta(mrr-hsdRMS-mcrBC)$ , $\phi 80dlacZ\Delta M15$ , $\Delta lacX74$ , <i>recA1</i> , <i>endA1</i> , <i>araD139</i> , $\Delta(ara, leu)7697$ , <i>galU</i> , <i>galK</i> , <i>rpsL</i> , <i>nupG</i>                                                                                                                                                                                   | Gibco BRL                            |
| BL21(DE3)                    | F <sup>-</sup> <i>dcm</i> , <i>ompT</i> , <i>hsdS</i> (r <sub>B</sub> <sup>-</sup> m <sub>B</sub> <sup>-</sup> ), <i>gal</i>                                                                                                                                                                                                                                                                                           | Invitrogen                           |
| ET12567/pUZ8002              | F <sup>-</sup> <i>ara-14</i> , <i>leuB6</i> , <i>fhuA13</i> , <i>lacY1</i> , <i>tsx-78</i> , <i>supE44</i> , <i>glnV44</i> , <i>galK2</i> , <i>galT22</i> , <i>mcrA</i> , <i>dcm-6</i> , <i>hisG4</i> , <i>rfbD1</i> , <i>rpsL136</i> , <i>dam-13::Tn9</i> , <i>xyl-5</i> , <i>mtl-1</i> , <i>recF143</i> , <i>thi-1</i> , <i>mcrB</i> , <i>hsdR2</i> , <i>hsdS::Tn10pUZ8002</i> : (derivative of pUB307, <i>tra</i> ) | (5, 6)                               |

|                |                                                                                                                                                                                                                                                                     |           |
|----------------|---------------------------------------------------------------------------------------------------------------------------------------------------------------------------------------------------------------------------------------------------------------------|-----------|
| BW25113/pIJ790 | $\Delta(araD-araB)567$ , $\Delta lacZ4787(::rrnB-3)$ , <i>rph-1</i> , $\Delta(rhaD-rhaB)568$ , <i>hsdR514</i> , $\lambda$ ; pIJ790: $\lambda$ -RED ( <i>ParaBAD</i> , <i>gam</i> , <i>bet</i> , <i>exo</i> ), <i>cat</i> , <i>araC</i> , <i>rep101<sup>ts</sup></i> | (7, 8)    |
| Plasmids       |                                                                                                                                                                                                                                                                     |           |
| pET-26b        | Kan <sup>+</sup> , <i>ori<sup>f1</sup></i> , <i>lacI</i> , <i>ori<sup>pBR322</sup></i> , T7 promoter                                                                                                                                                                | Novagen   |
| pHL133         | <i>aac(3)IV</i> , <i>oriT</i> , <i>int</i> , <i>xylE</i>                                                                                                                                                                                                            | (9)       |
| pHZ1358        | pIJ101 derivative, <i>bla</i> , <i>tsr</i> , <i>cos</i> , <i>oriT</i> , <i>sti</i>                                                                                                                                                                                  | (10)      |
| pIB139         | <i>aac(3)IV</i> , <i>oriT</i> , <i>int</i> , <i>ermE*</i> promoter                                                                                                                                                                                                  | (11)      |
| pIJ773         | <i>aac(3)IV</i> , <i>rep<sup>pUC</sup></i> , <i>oriT</i>                                                                                                                                                                                                            | (7)       |
| pIJ2925        | <i>bla</i> , <i>ori</i> , <i>lacZ<math>\alpha</math></i>                                                                                                                                                                                                            | (12)      |
| 1E2            | pHZ1357 derivative, cosmid harboring <i>pnt</i> gene cluster                                                                                                                                                                                                        | (2)       |
| G21            | pHZ1357 derivative, cosmid harboring <i>pen</i> gene cluster                                                                                                                                                                                                        | (2)       |
| pDQ20          | pSET152 derivative, <i>orf-1</i> , <i>pntR</i> , <i>gapR</i> , and partial <i>pntM</i>                                                                                                                                                                              | (2)       |
| pDQ44          | pJTU1278 derivative, without XbaI and SpeI sites                                                                                                                                                                                                                    | (2)       |
| pDQ71          | Gene <i>pntR</i> amplified with primer DQ108F/R, digested with NdeI/HindIII and inserted into the corresponding site of pET-26b                                                                                                                                     | This work |
| pDQ72          | Gene <i>penR</i> amplified with primer DQ109F/R, digested with NdeI/HindIII and inserted into the corresponding site of pET-26b                                                                                                                                     | This work |
| pDQ75          | 473-bp DNA fragment harboring partial <i>penM</i> and the intergenic region of <i>penM</i> and <i>penH</i> amplified with primer pair DQ103F2 and DQ103R2 inserted into SmaI site of pIJ2925                                                                        | This work |
| pDQ77          | Gene <i>tsr</i> from pHZ1358 amplified with primer DQ113F/R, digested with EcoRI and inserted into the corresponding site of pIB139                                                                                                                                 | This work |
| pDQ78          | Gene <i>tsr</i> from pHZ1358 amplified with primer DQ113F/R, digested with EcoRI and inserted into the corresponding site of pHL133                                                                                                                                 | This work |

|        |                                                                                                                                                                                                                               |           |
|--------|-------------------------------------------------------------------------------------------------------------------------------------------------------------------------------------------------------------------------------|-----------|
| pDQ80  | ca. 0.5-kb BglIII DNA fragment harboring partial <i>penM</i> and the intergenic region of <i>penM</i> and <i>penH</i> recycled from pDQ75 and inserted into BglIII site of vector pDQ78                                       | This work |
| pDQ88  | ca. 823 bp DNA fragment carrying <i>penR</i> and its promoter amplified with primer DQ109R and DQ112R, inserted into SmaI site of pIJ2925                                                                                     | This work |
| pDQ89  | A 1728-bp SmaI DNA fragment harboring partial <i>orf -1</i> , complete <i>pntR</i> and partial <i>gapR</i> recycled from pDQ20 and inserted SmaI site of pIJ2925                                                              | This work |
| pDQ90  | an 823-bp BglIII and DNA fragment carrying <i>penR</i> and its promoter from pDQ88 recycled and inserted into BamHI site of pDQ77                                                                                             | This work |
| pDQ91  | ca. 1.8-kb BglIII DNA fragment harboring partial <i>orf -1</i> , complete <i>pntR</i> and partial <i>gapR</i> recycled from pDQ89 and inserted into BamHI site of pDQ77                                                       | This work |
| pDQ93  | ca. 6.7-kb BamHI DNA fragment harboring the upstream of <i>pen</i> gene cluster, <i>penR</i> , <i>gapN</i> and partial <i>pntM</i> recycled from cosmid G21 inserted into the corresponding site of pDQ44                     | This work |
| pDQ94  | 198-bp DNA fragment of <i>penR</i> from nt 223 to nt 420 of pDQ93 replaced by 1369-bp <i>oriT</i> and <i>aac(3)IV</i> using PCR targeting system                                                                              | This work |
| pDQ108 | 548-bp DNA fragment carrying partial <i>penR</i> and the intergenic region of <i>penR</i> and <i>gapN</i> amplified with primer pair DQ84F and DQ112R, and inserted into SmaI site of vector pIJ2925                          | This work |
| pDQ109 | ca. 540-bp BamHI DNA fragment fragment carrying partial <i>penR</i> and the intergenic region of <i>penR</i> and <i>gapN</i> recycled from pDQ108 and inserted into BglIII site of pDQ78 with the direction along <i>penR</i> | This work |
| pDQ110 | ca. 540-bp BamHI DNA fragment fragment carrying partial <i>penR</i> and the intergenic region of <i>penR</i> and <i>gapN</i> recycled from pDQ108 and inserted into BglIII site of pDQ78 with the direction along <i>gapN</i> | This work |

**Table S2.** Primers used in this study.

| <b>Primer</b> | <b>Sequence (5'—3'), (restriction enzyme site underlined)</b>    | <b>Purpose</b>                           |
|---------------|------------------------------------------------------------------|------------------------------------------|
| DQ92F2        | AAGACCGAGCAGATCAGCCAGCCGGGGCTCA<br>CTCAGCTGATTCCGGGGAT CCGTCGACC | <i>penR</i> deletion                     |
| DQ92R         | CCGTCCGGCTTCGGTCCCGAGTTCGCCAGGC<br>GGGTCAGTGTAGGCTGGAGCTGCTTC    | <i>penR</i> deletion                     |
| DQ93F         | TCCGGCTTCGGTCCC GAGTT                                            | Confirmation of<br><i>penR</i> mutant    |
| DQ93R         | TGCTTTGGCTGTACCTGTCT                                             | Confirmation of<br><i>penR</i> mutant    |
| DQ96F         | TGGAGGAGGTGAAGGAGGCG                                             | Intergenic region<br>of <i>gapR-pntM</i> |
| DQ96R2        | GAGATCCGTCATATGGTCCGTC                                           | Intergenic region<br>of <i>gapR-pntM</i> |
| DQ97F2        | CGGGGACGCGGTGATGCT                                               | Intergenic region<br>of <i>pntM-pntH</i> |
| DQ97R2        | GTCCGTCATATGTCCTTGTCCT                                           | Intergenic region<br>of <i>pntM-pntH</i> |
| DQ98F         | CGACGGCAGCCACAAGAAG                                              | Intergenic region<br>of <i>pntH-pntG</i> |
| DQ98R2        | GTTTCGTCATATGTTGCCTACCAG                                         | Intergenic region<br>of <i>pntH-pntG</i> |
| DQ99F         | GCATCGGCTGCTACGGAGTG                                             | Intergenic region<br>of <i>pntG-pntF</i> |
| DQ99R2        | GTGAGTGCATATGGCTGTCTCCG                                          | Intergenic region<br>of <i>pntG-pntF</i> |
| DQ100F        | ACGACGTGCTCGGCATCTGG                                             | Intergenic region<br>of <i>pntB-pntA</i> |
| DQ100R2       | CCTGGGGCATATGGGAATCCTCG                                          | Intergenic region<br>of <i>pntB-pntA</i> |
| DQ101F        | GCGTCGCTGGAGAAGGAAGA                                             | Intergenic region<br>of <i>pntA-pntI</i> |
| DQ101R2       | GCTCGGTCATATGATCCTCGACT                                          | Intergenic region                        |

|         |                                       |                                       |
|---------|---------------------------------------|---------------------------------------|
|         |                                       | of <i>pntA-pntI</i>                   |
| DQ102F2 | ATTCTCCAACCGCCTCAT                    | Intergenic region of <i>gapN-penM</i> |
| DQ102R2 | CTTCACCTCGTCGTATCG                    | Intergenic region of <i>gapN-penM</i> |
| DQ103F  | CCGTCGGCGAGACAGTGAT                   | Intergenic region of <i>penM-penH</i> |
| DQ103R  | TGAGGGTGTCGAGCGTGGTG                  | Intergenic region of <i>penM-penH</i> |
| DQ103F2 | AAGGCGCACATGGCATTTC                   | Intergenic region of <i>penM-penH</i> |
| DQ103R2 | GCTGAGAGTGTCCGTCAT                    | Intergenic region of <i>penM-penH</i> |
| DQ103F3 | TTCGCCCGGCGCCATCGA                    | Intergenic region of <i>penM-penH</i> |
| DQ103R3 | GCGGAGGTGACGAGGTCA                    | Intergenic region of <i>penM-penH</i> |
| DQ105F2 | GCGGAACCCTCTATGTCTC                   | Intergenic region of <i>penG-penF</i> |
| DQ105R  | AGGACCCCGGCGTTGTTG                    | Intergenic region of <i>penG-penF</i> |
| DQ107F  | CGAGCACGGCTGGTCCAAGA                  | Intergenic region of <i>penA-penI</i> |
| DQ107R2 | TCTTGATCTCGACCAGGTT                   | Intergenic region of <i>penA-penI</i> |
| DQ108F  | CATTTCCCATATGACTCCTACTCAGCG (NdeI)    | <i>pntR</i>                           |
| DQ108R  | CGTGATCAAAGCTTCCGTGCGGCTT (HindIII)   | <i>pntR</i>                           |
| DQ109F  | TATTTCCCATATGACCTTCCACCACCG (NdeI)    | <i>penR</i>                           |
| DQ109R  | TTTGATCAAAGCTTCCGTCCGGCTTCG (HindIII) | <i>penR</i>                           |
| DQ110F  | CATGCTCTTCCTGGACCT                    | <i>hrdB</i>                           |
| DQ110R  | GGACCTCGATGACCTTCT                    | <i>hrdB</i>                           |

|         |                                           |                                       |
|---------|-------------------------------------------|---------------------------------------|
| DQ111F  | GTGGATCCCACCCTGGAAATGTATCG (BamHI)        | Intergenic region of <i>pntR-gapR</i> |
| DQ111R  | CGGGATCCCATTGGTGTGTTCTCA (BamHI)          | Intergenic region of <i>pntR-gapR</i> |
| DQ111F2 | GCAMCTCGGCGCAACG<br>(M=A or C)            | Intergenic region of <i>pntR-gapR</i> |
| DQ111R2 | AACGCGGGCCGTACGCCT                        | Intergenic region of <i>pntR-gapR</i> |
| DQ112F  | TGGGATCCCATACTGGAAATATATCG (BamHI)        | Intergenic region of <i>penR-gapN</i> |
| DQ112R  | GTGGATCCCATGATTTCCGTCCTGAT (BamHI)        | Intergenic region of <i>penR-gapN</i> |
| DQ112F2 | TGCGGGGCAGGCCGACCA                        | Intergenic region of <i>penR-gapN</i> |
| DQ112R2 | GTTACACACCACGCGCCA                        | Intergenic region of <i>penR-gapN</i> |
| DQ112R3 | CAGCGGTCGCGGCCGTCA                        | Intergenic region of <i>penR-gapN</i> |
| DQ113F  | GGGAATTC TGATCAAGGCGAATACTT (EcoRI, BclI) | <i>tsr</i>                            |
| DQ113R  | TCGAATTC TGATCATCACTGACGAAT (EcoRI, BclI) | <i>tsr</i>                            |
| WYP7F   | CCCGAGGGCGACTTGAAC                        | <i>penR</i>                           |
| WYP7R   | CCGGCTGGCTGATCTGCT                        | <i>penR</i>                           |
| WYP9F   | GACCATCACTGTGGGAAT                        | <i>gapN</i>                           |
| WYP9R   | ACACGCTGTCTACTTCA                         | <i>gapN</i>                           |
| WYP10F  | GCACGGCTACGTCTATCT                        | <i>penH</i>                           |
| WYP10R  | CTTCTCCCAGACCTTGAG                        | <i>penH</i>                           |

**Table S3.** TTA codons in pentalenolactone (*pen*, *pnt*, *SBI*) and neopentalenolactone (*ptl*) biosynthetic gene clusters.

|            | <i>R</i> | <i>gap</i> | <i>M</i> | <i>H</i> | <i>G</i> | <i>F</i> | <i>E</i> | <i>D</i> | <i>B</i> | <i>A</i> | <i>I</i> |
|------------|----------|------------|----------|----------|----------|----------|----------|----------|----------|----------|----------|
| <i>pen</i> | -        | -          | 7        | -        | -        | 3        | -        | -        | -        | -        | -        |
| <i>pnt</i> | -        | -          | 7        | -        | -        | -        | 69       | 44       | -        | -        | -        |
| <i>SBI</i> |          | -          | 7        | -        | -        | -        | -        | -        | -        | -        | -        |
| <i>ptl</i> | -        | -          |          | 31       | 30       | -        | 591      | -        | -        | -        | -        |

*ptl*, *S. avermitilis* *ptl* gene cluster for neopentalenolactone biosynthesis;

*pnt*, *S. arenae* *pnt* gene cluster for pentalenolactone biosynthesis;

*pen*, *S. exfoliatus* *pen* gene cluster for pentalenolactone biosynthesis;

*SBI*, proposed *S. bingchengensis* pentalenolactone biosynthetic gene cluster;

Rows, genes organized by original location in gene cluster;

Columns, homologous genes;

Numbers correspond to amino acid residue encoded by TTA codons;

Minuses indicate that no amino acids are encoded by TTA codons;

The blank entry indicates that there is no homologue of *penM* in the *ptl* cluster.



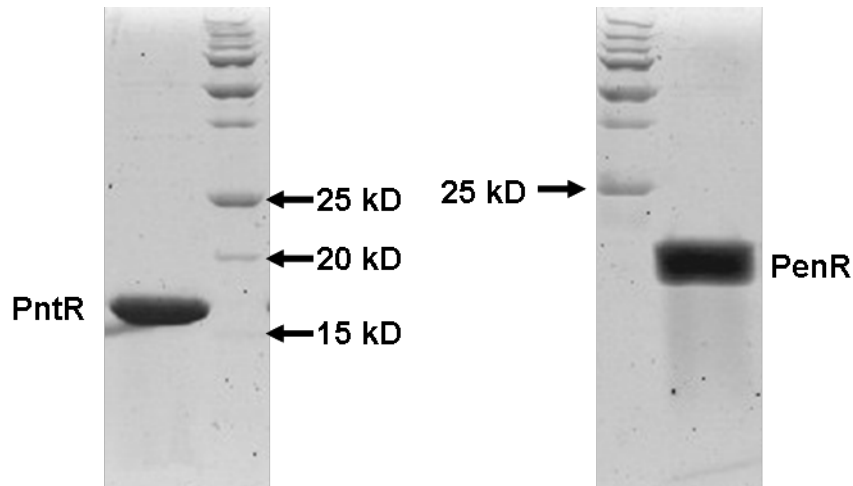

**Fig. S1.** SDS-PAGE analysis of purified recombinant protein PntR-His<sub>6</sub>-tag and PenR-His<sub>6</sub>-tag

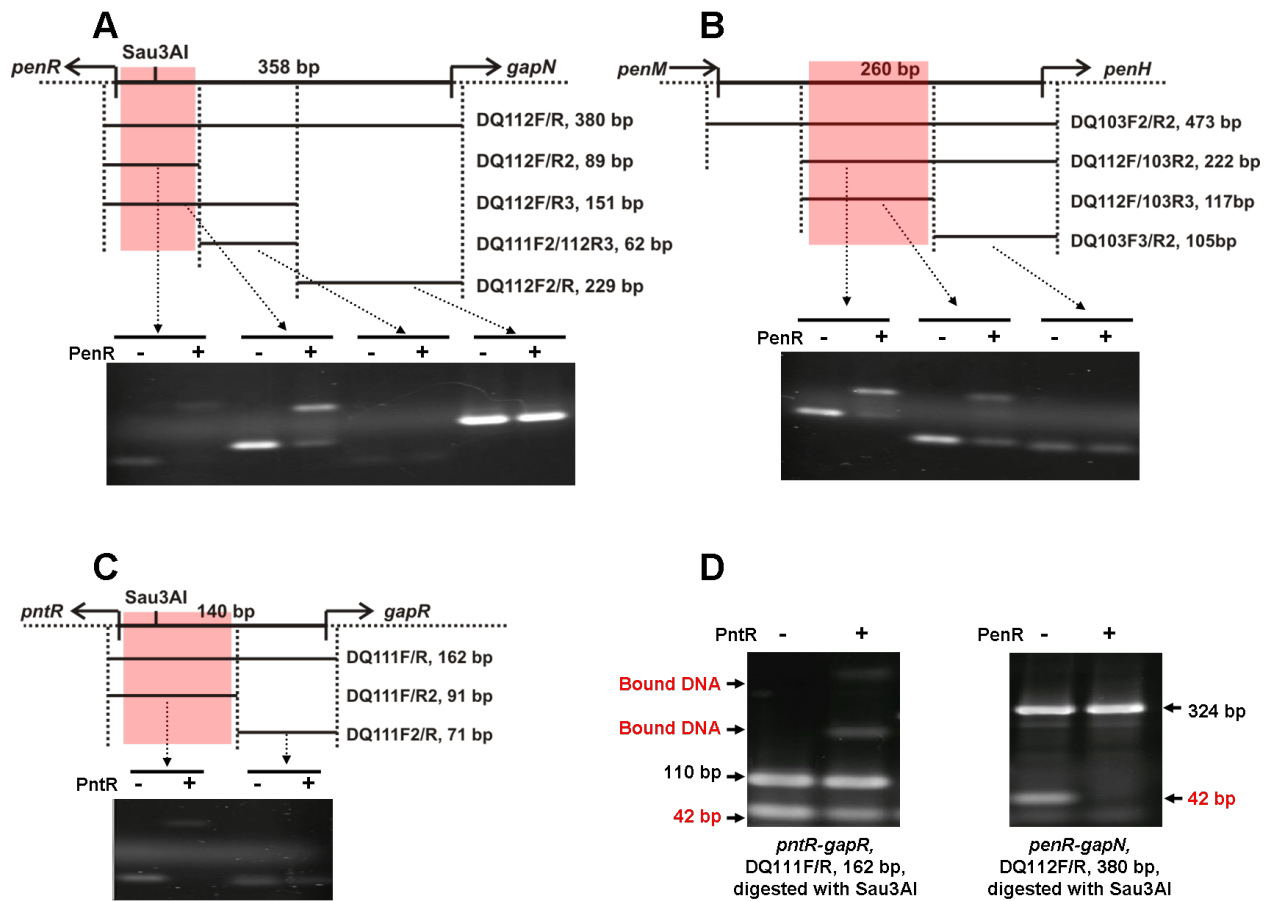

**Fig. S2.** EMSA of binding of PenR and PntR with their target DNA segments. A, PenR with DNA fragments located within the *penR-gapN* intergenic region. B, PenR with DNA fragments located within the *penM-penH* intergenic region. C, PntR with DNA fragments located within the *pntR-gapR* intergenic region. D, PntR and PenR with conserved ~42-bp DNA segments prepared by *Sau3AI* digestion of the *pntR-gapR* and *penR-gapN* intergenic regions, respectively.

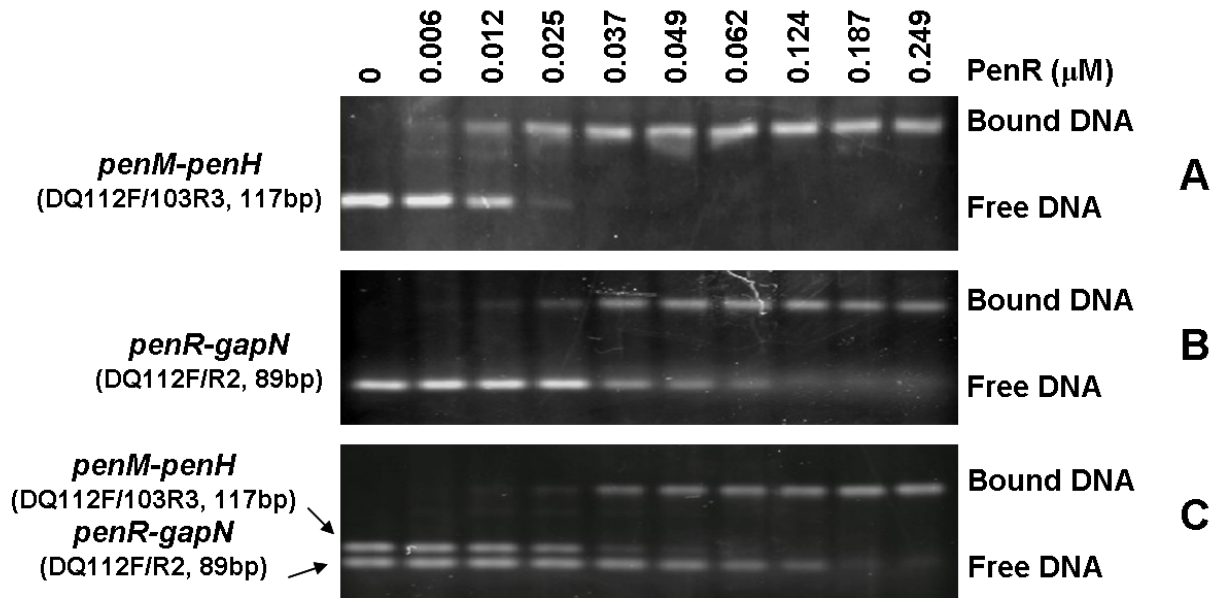

**Fig. S3.** EMSA comparison of binding strength of PenR with DNA from two *pen* intergenic regions. A, *penM-penH* intergenic region. B, *penR-gapN* intergenic region DNA. C. Mixture of DNA from both *penM-penH* and *penR-gapN* intergenic regions.

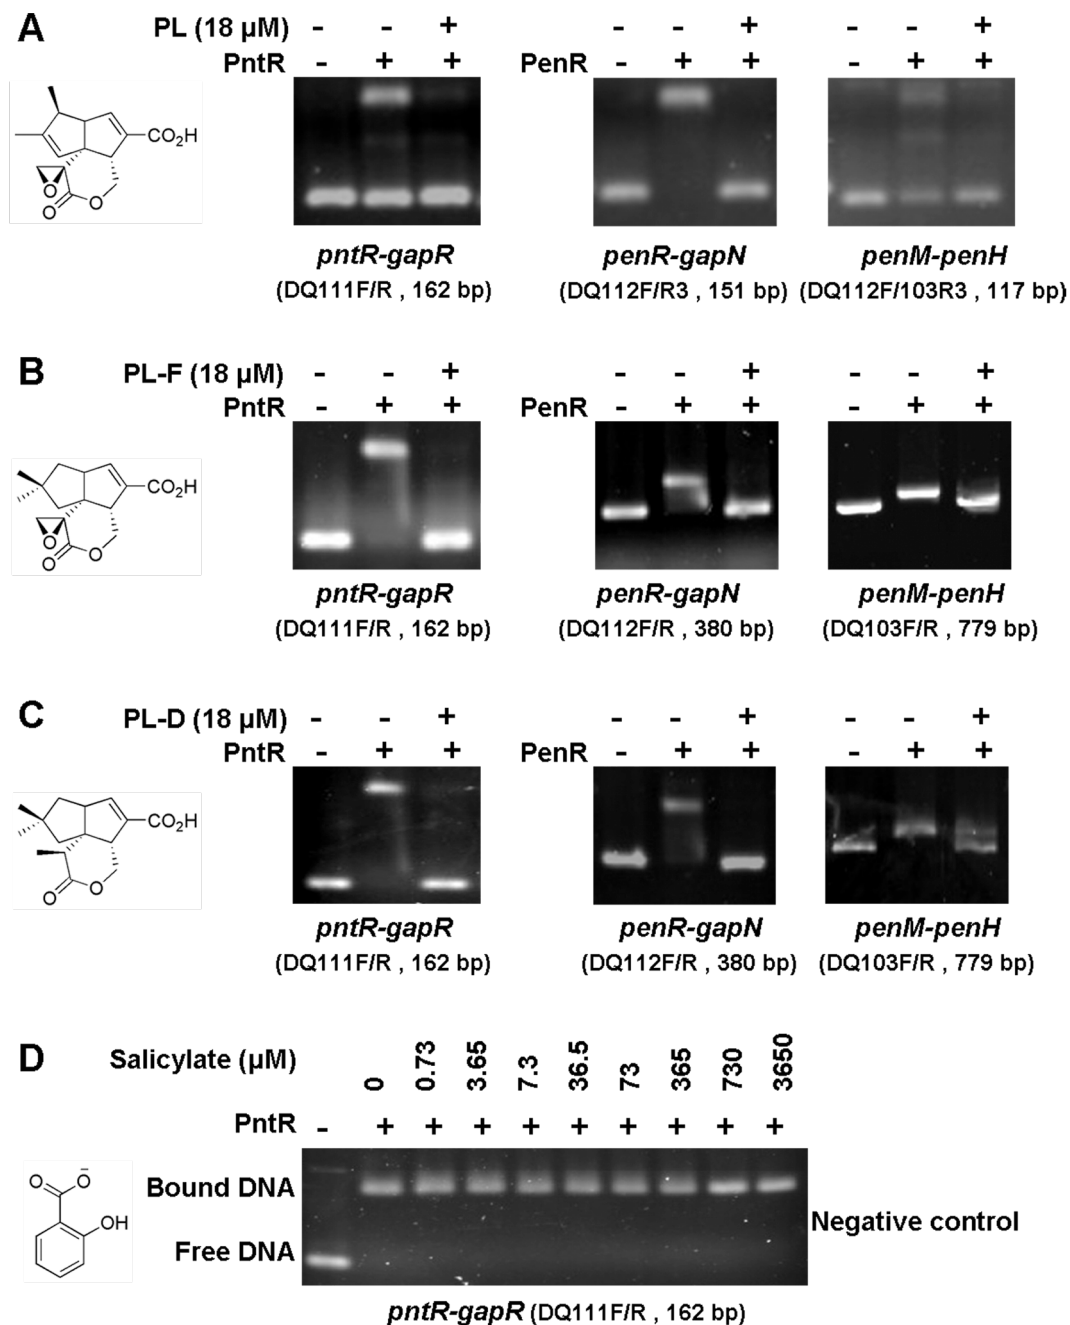

**Fig. S4.** EMSA analysis of release of bound DNA from binding to PenR PenR proteins by added pentalenolactones. A, Release of bound DNA in presence of 18  $\mu$ M pentalenolactone: PntR bound to DNA from *pntR-gapR* intergenic region; PenR bound to DNA from *penR-gapN* intergenic region; PenR bound to DNA from *penM-penH* intergenic region. B, Release of bound DNA from PntR and PenR in presence of pentalenolactone F (18  $\mu$ M). C, Release of bound DNA in presence of in presence of pentalenolactone D (18  $\mu$ M). D. Negative control, addition of salicylate (0 – 3.7 mM) to PntR bound to DNA from *pntR-gapR* intergenic region.

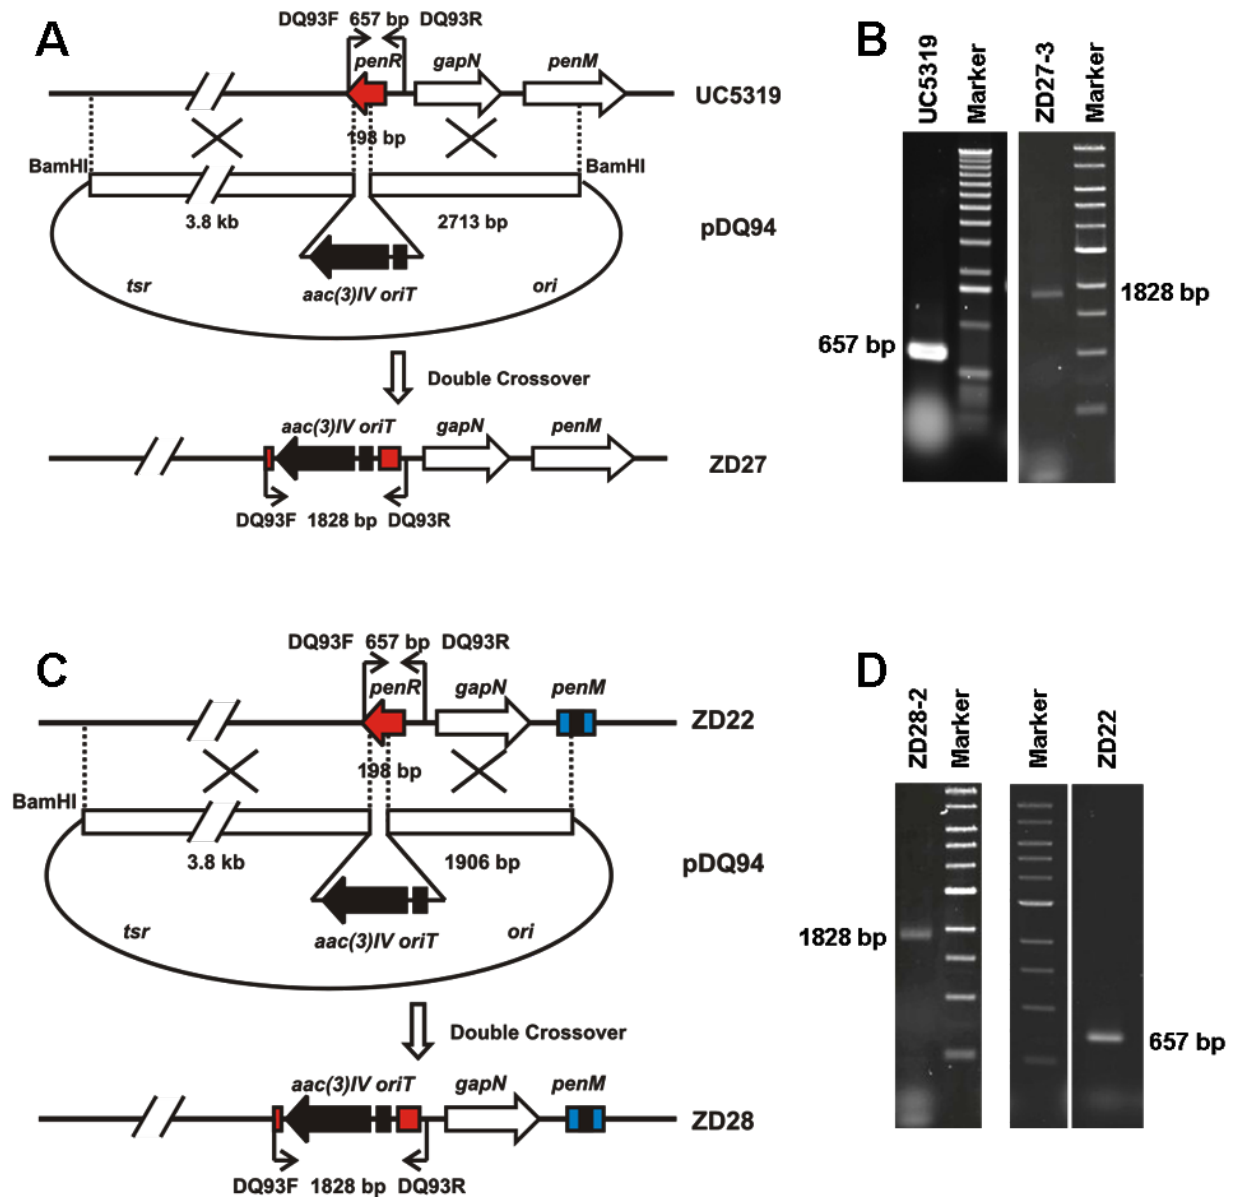

**Fig. S5.** A, Construction of *penR* deletion mutant *S. exfoliatus* ZD27. B, PCR verification of the *penR* deletion mutant. C, Construction of *penM-penR* deletion mutant *S. exfoliatus* ZD28. D, PCR verification of the *penM-penR* deletion mutant.

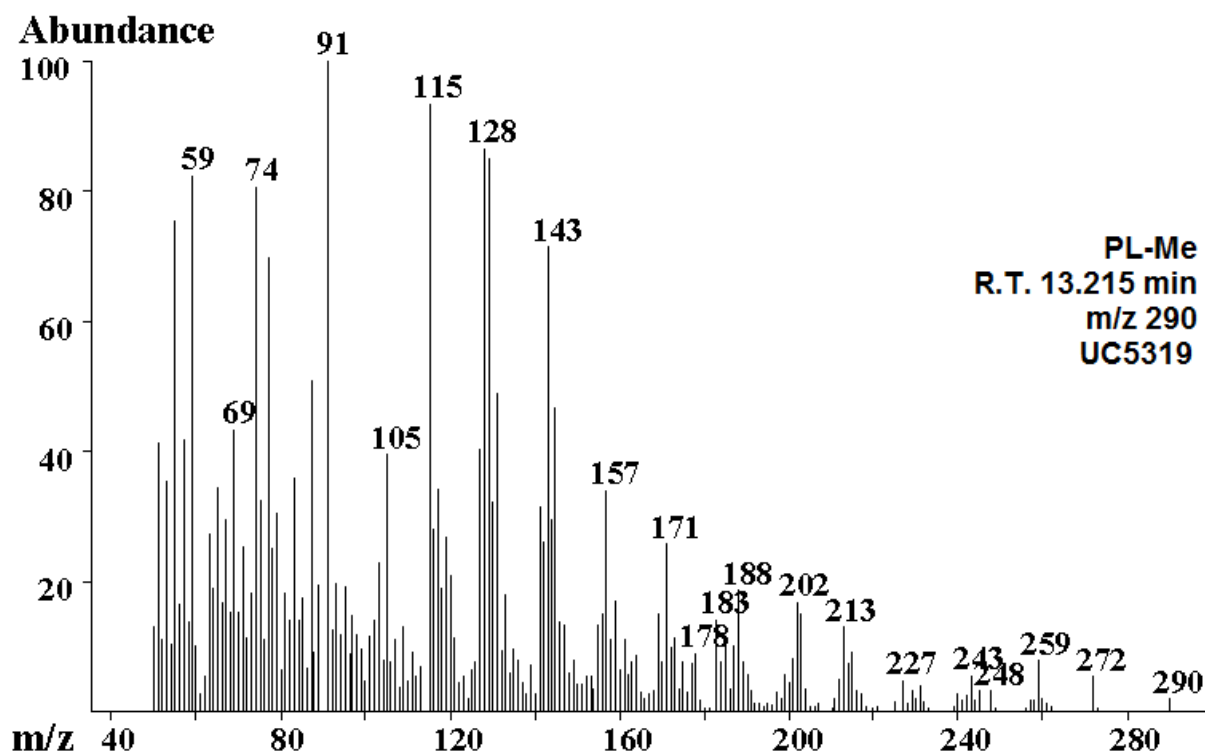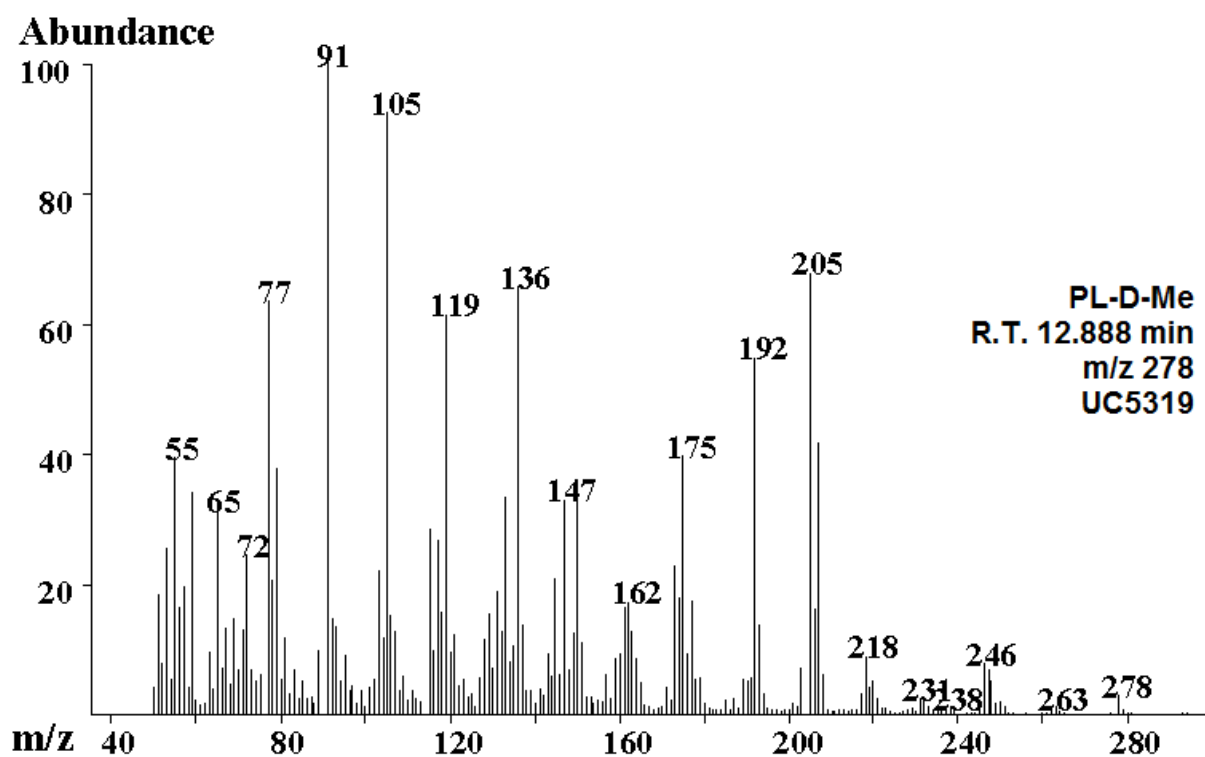

**Fig. S6.** MS spectra of pentalenolactone methyl ester and pentalenolactone D methyl ester produced by wild-type *S. exfoliatus* UC5319 and the *penR* mutant complemented with *penR*, *S. exfoliatus* ZD27::pDQ90.

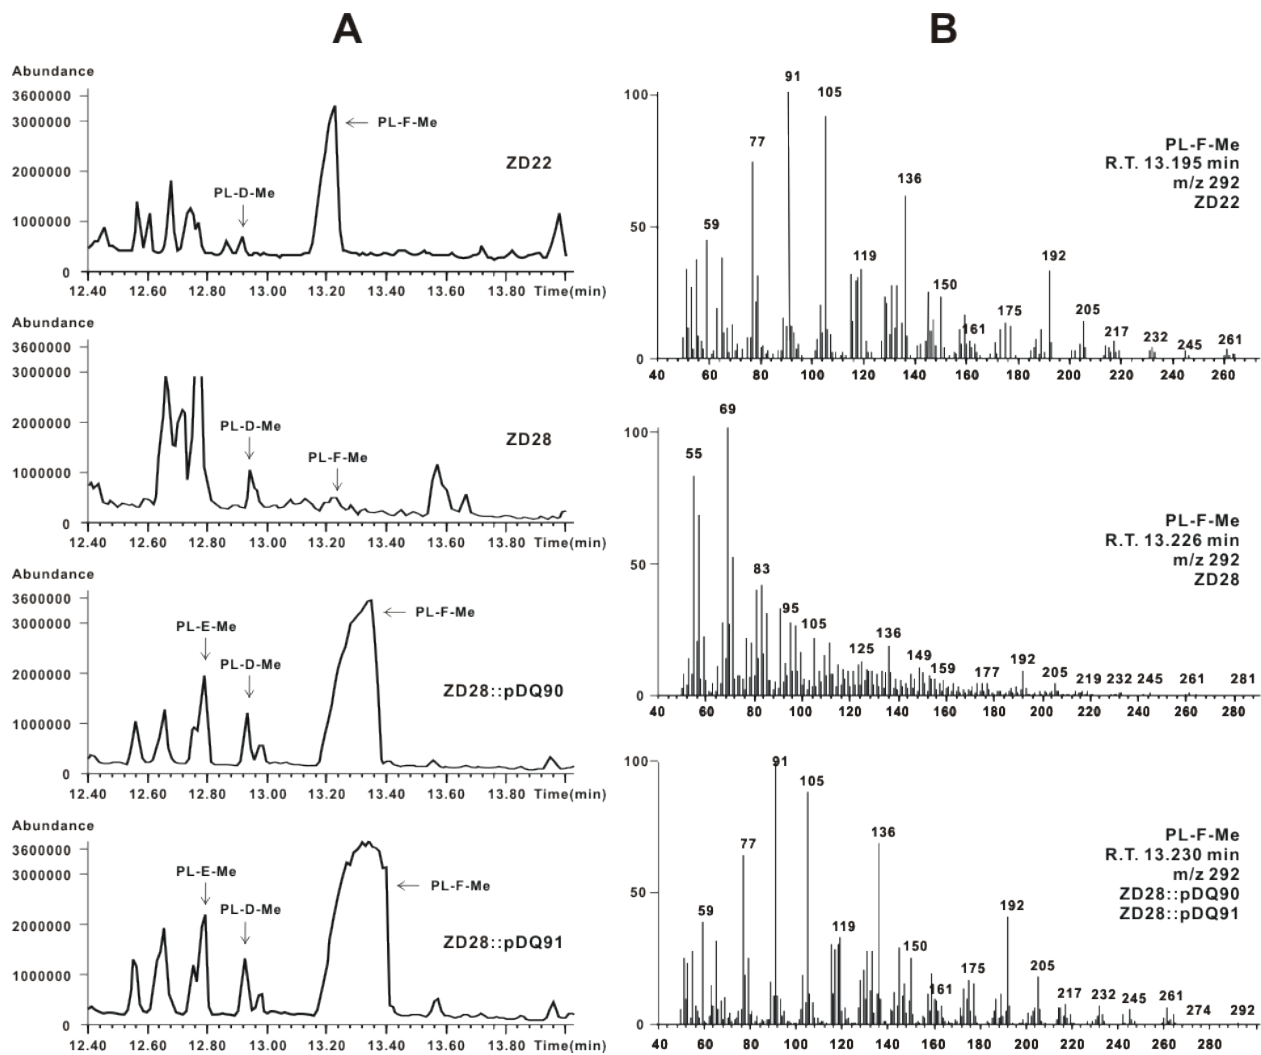

**Fig. S7.** GC-MS analysis of *S. exfoliatus penR* mutants. A, GC analysis of *penM* mutant *S. exfoliatus* ZD22, *penM-penR* double mutant *S. exfoliatus* ZD28, *S. exfoliatus* ZD28 complemented with *penR* (pDQ90) and *S. exfoliatus* ZD28 complemented with *pntR* (pDQ91). B, MS spectra of PL-F-Me produced by ZD22, ZD28:pDQ90, and ZD28:pDQ91

## REFERENCES

1. **Martin DG, Slomp G, Mizens S, Duchamp DJ, Chidester CG.** 1970. The structure and absolute configuration of pentalenolactone (PA 132). *Tetrahedron Lett.*:4901-4904.
2. **Seo MJ, Zhu D, Endo S, Ikeda H, Cane DE.** 2011. Genome mining in *Streptomyces*. Elucidation of the role of Baeyer-Villiger monooxygenases and non-heme iron-dependent dehydrogenase/oxygenases in the final steps of the biosynthesis of pentalenolactone and neopentalenolactone. *Biochemistry* **50**:1739-1754.
3. **Zhu D, Seo MJ, Ikeda H, Cane DE.** 2011. Genome mining in *Streptomyces*. Discovery of an unprecedented P450-catalyzed oxidative rearrangement that is the final step in the biosynthesis of pentalenolactone. *J. Am. Chem. Soc.* **133**:2128-2131.
4. **Keller-Schierlein W, Lemke J, Nyfeler R, Zähler H.** 1972. Stoffwechselprodukte von Mikroorganismen. 105. Arenaemycin E, D, und C. *Arch. Mikrobiol.* **84**:301-316.
5. **Paget MS, Chamberlin L, Atrih A, Foster SJ, Buttner MJ.** 1999. Evidence that the extracytoplasmic function sigma factor sigmaE is required for normal cell wall structure in *Streptomyces coelicolor* A3(2). *J. Bacteriol.* **181**:204-211.
6. **Macneil DJ, Gewain KM, Ruby CL, Dezeny G, Gibbons PH, Macneil T.** 1992. Analysis of *Streptomyces-Avermitilis* genes required for avermectin biosynthesis utilizing a novel integration vector. *Gene* **111**:61-68.
7. **Gust B, Challis GL, Fowler K, Kieser T, Chater KF.** 2003. PCR-targeted *Streptomyces* gene replacement identifies a protein domain needed for biosynthesis of the sesquiterpene soil odor geosmin. *Proc. Natl. Acad. Sci. U S A* **100**:1541-1546.
8. **Datsenko KA, Wanner BL.** 2000. One-step inactivation of chromosomal genes in *Escherichia coli* K-12 using PCR products. *Proc. Natl. Acad. Sci. U S A* **97**:6640-6645.
9. **Liang H, Gaber RF.** 1996. A novel signal transduction pathway in *Saccharomyces cerevisiae* defined by Snf3-regulated expression of HXT6. *Mol. Biol. Cell* **7**:1953-1966.
10. **Sun Y, Zhou X, Liu J, Bao K, Zhang G, Tu G, Kieser T, Deng Z.** 2002. '*Streptomyces nanchangensis*', a producer of the insecticidal polyether antibiotic nanchangmycin and the antiparasitic macrolide meilingmycin, contains multiple polyketide gene clusters. *Microbiology* **148**:361-371.
11. **Wilkinson CJ, Hughes-Thomas ZA, Martin CJ, Bohm I, Mironenko T, Deacon M, Wheatcroft M, Wirtz G, Staunton J, Leadlay PF.** 2002. Increasing the efficiency of heterologous promoters in actinomycetes. *J. Mol. Microbiol. Biotechnol.* **4**:417-426.
12. **Janssen GR, Bibb MJ.** 1993. Derivatives of pUC18 that have BglII sites flanking a modified multiple cloning site and that retain the ability to identify recombinant clones by visual screening of *Escherichia coli* colonies. *Gene* **124**:133-134.
